# Supplementary material for: Ultra-temperature and high thermal stability thermosensitive high-entropy ceramics up to 1873 K
Source: Royal Society of Chemistry journal article supplement (doi:10.1039/d4ta03260h), 2024-01-01
Supplement: d4ta03260h1.pdf [file d4ta03260h1.pdf]

## Supporting Information

# Ultra-temperature and High Thermal Stability Thermosensitive High-Entropy Ceramics up to 1873 K

Yafei Liu<sup>a, b</sup>, Hao Sun<sup>a, b</sup>, Ruifeng Wu<sup>a, b</sup>, Aimin Chang<sup>a</sup>, Bo Zhang<sup>a, \*</sup>

<sup>a</sup> State Key Laboratory of Functional Materials and Devices for Special Environmental Conditions; Xinjiang Key Laboratory of Electronic Information Materials and Devices; Xinjiang Technical Institute of Physics & Chemistry of CAS, Urumqi 830011, China

<sup>b</sup> Center of Materials Science and Optoelectronics Engineering, University of Chinese Academy of Sciences, Beijing 100049, China

\*E-mail address: zhangbocas@ms.xjb.ac.cn

\*Present address: Xinjiang Technical Institute of Physics & Chemistry of CAS, Urumqi 830011, China

**Table S1.** Chemical formula, configuration entropy ( $\Delta S_{\text{config}}$ ) and size disorder ( $\delta$ ) of Yb<sub>3</sub>NbO<sub>7</sub>-based ceramics.

| <b>Chemical Formula</b>                               | <b>Configurational Entropy (<math>\Delta S_{\text{config}}</math>)</b> | <b>Size disorder (<math>\delta</math>)</b> |
|-------------------------------------------------------|------------------------------------------------------------------------|--------------------------------------------|
| Yb <sub>3</sub> NbO <sub>7</sub>                      | /                                                                      | /                                          |
| Yb <sub>3</sub> TaO <sub>7</sub>                      | /                                                                      | /                                          |
| Yb <sub>3</sub> (VNbTa) <sub>1/3</sub> O <sub>7</sub> | $\Delta S_{\text{config}} = 1.10 \text{ R}$                            | $\delta = 7.75 \%$                         |
| (HoErTmYbLu) <sub>3/5</sub> NbO <sub>7</sub>          | $\Delta S_{\text{config}} = 1.53 \text{ R}$                            | $\delta = 1.38 \%$                         |

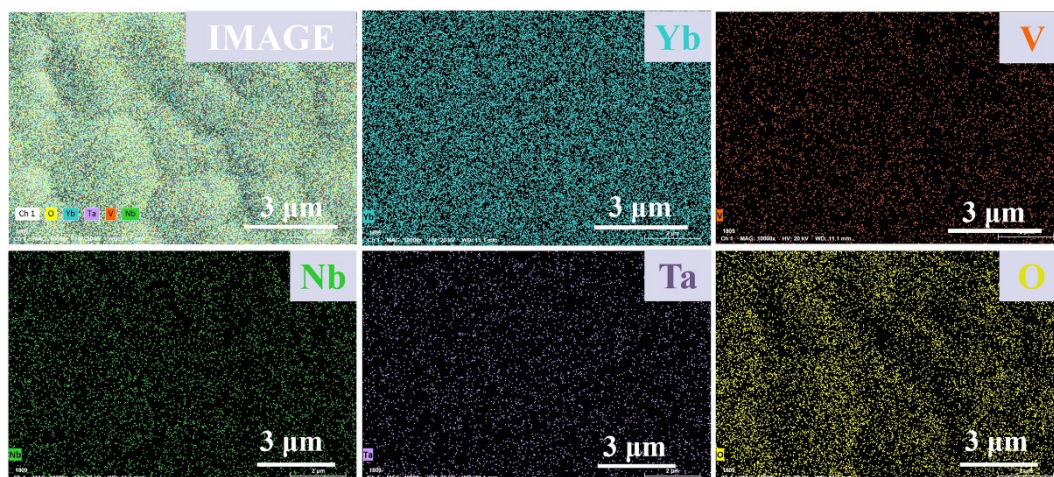

Figure S1. Elemental distribution mapping of  $\text{Yb}_3(\text{V}_{1/3}\text{Nb}_{1/3}\text{Ta}_{1/3})\text{O}_7$ .

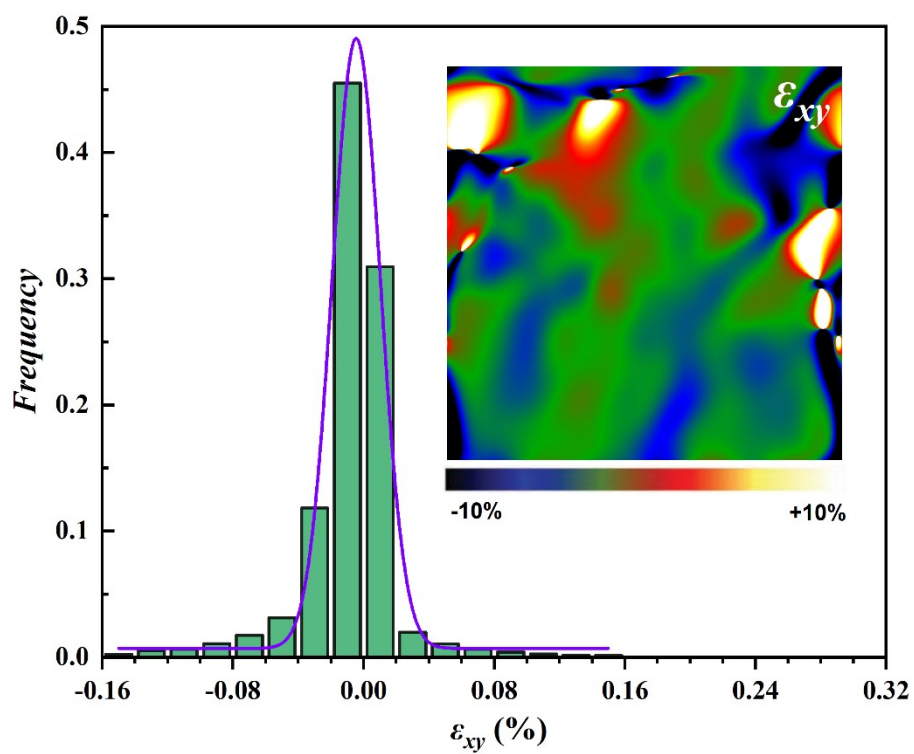

**Figure S2.** The shear strains along the  $xy$  directions based on geometric phase analysis (GPA) in  $\text{Yb}_3(\text{V}_{1/3}\text{Nb}_{1/3}\text{Ta}_{1/3})\text{O}_7$ . The color scale in Figure represents the change in strain intensity from -10% (compression) to 10% (tension).

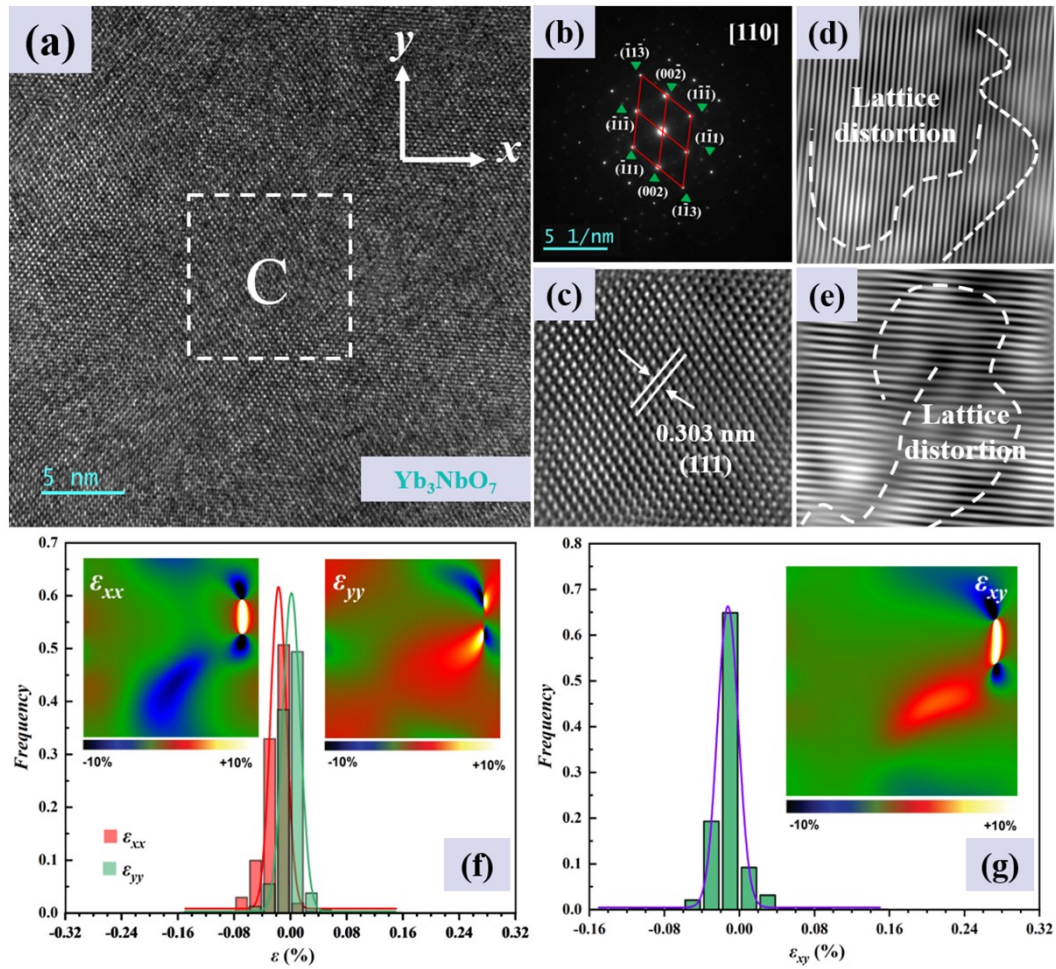

**Figure S3.** Microstructural of  $\text{Yb}_3\text{NbO}_7$  ceramics. (a) High-resolution transmission electron microscopy (HRTEM). (b) Selected area electron diffraction (SAED). (c-e) The inverse fast Fourier transform (IFFT) analysis of region C. (f) The normal strains along the  $xx$  and  $yy$  directions based on geometric phase analysis (GPA). (g) The shear strains along the  $xy$  directions based on GPA.



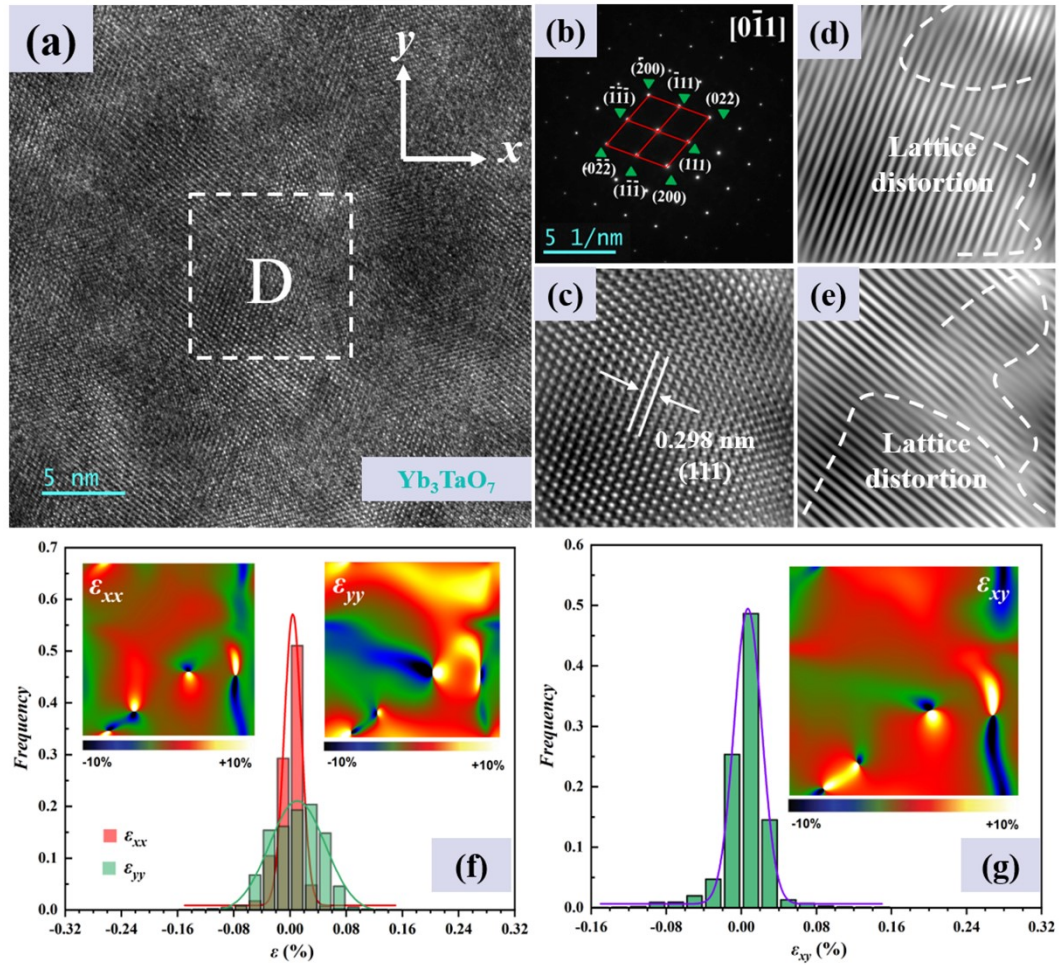

**Figure S4.** Microstructural of  $\text{Yb}_3\text{TaO}_7$  ceramics. (a) High-resolution transmission electron microscopy (HRTEM). (b) SAED. (c-e) The IFFT analysis of region D. (f) The normal strains along the  $xx$  and  $yy$  directions and (g) the shear strains along the  $xy$  directions based on GPA.

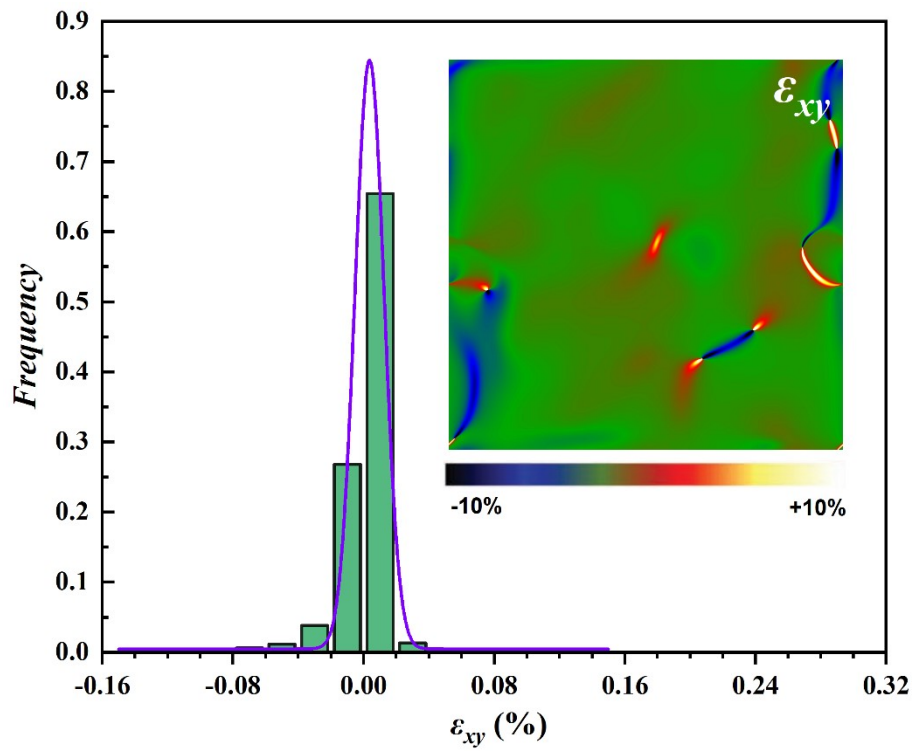

**Figure S5.** The shear strains along the  $xy$  directions based on GPA in  $(\text{Ho}_{0.2}\text{Er}_{0.2}\text{Tm}_{0.2}\text{Yb}_{0.2}\text{Lu}_{0.2})_3\text{NbO}_7$ .
